# Supplementary material for: Risk Factors for Predicting the Occult Hilar-Mediastinal lymph node Metastasis in Non-Small Cell Lung Cancer Patients with negative or symmetric uptake pattern on preoperative F-18 Fluorodeoxyglucose PET/CT
Source: Research Square preprint supplement (doi:10.21203/rs.3.rs-7172673/v1), 2025-10-29

**Additional file 1.**

We did k-fold validation first, and the results suggested that the 3.05 cm cutoff had reasonably good discriminatory power, but it also shows variability across folds, and some limitations in generalizability. therefore, we did sensitivity analyses below.

**
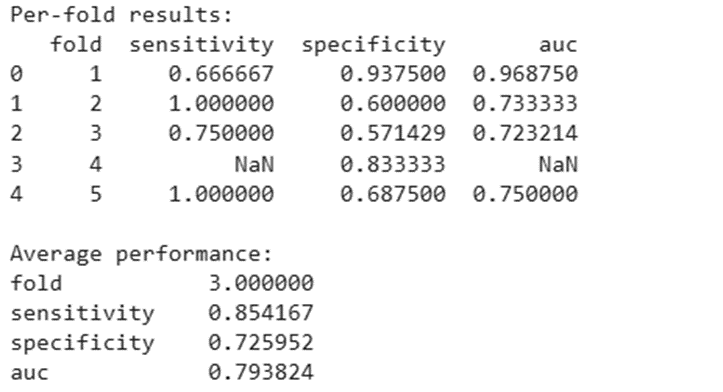
**

Therefore, we further conducted sensitivity analyses around 3.05cm cut off with multiple cut off.


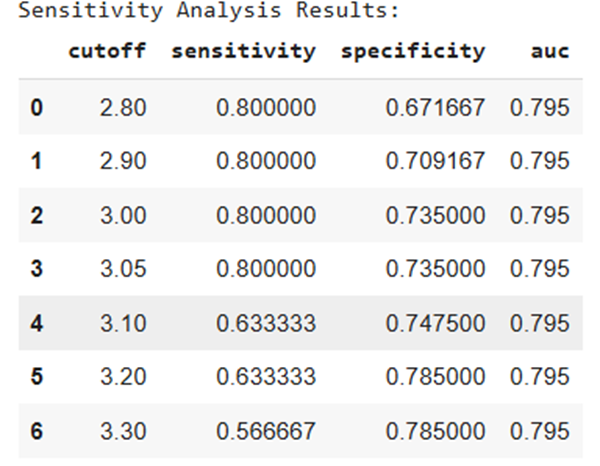


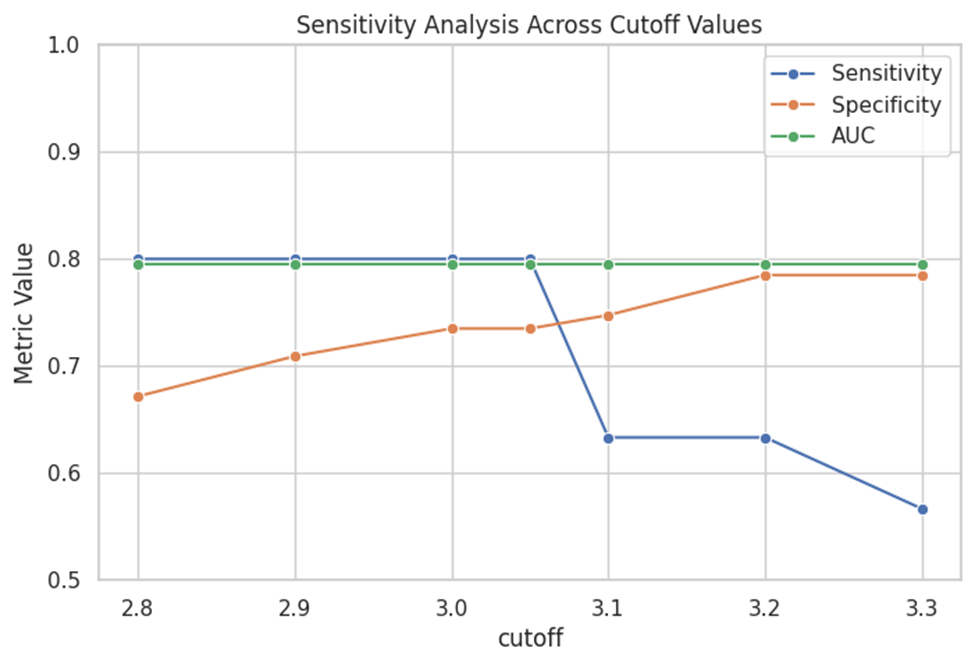

Supplement: Supplementary file 1 [file 38b16f59b904118c38375b85.docx]
